# Supplementary material for: Association of MALAT1 and PVT1 Variants, Expression Profiles and Target miRNA-101 and miRNA-186 with Colorectal Cancer: Correlation with Epithelial-Mesenchymal Transition
Source: MDPI journal article supplement (doi:10.3390/ijms22116147), 2021-06-07
Supplement: s1 [file s1]

## Supplementary Material

**Table S1:** Minor allele frequencies of the studied SNPs

|                         | MAF in Our Studied Population | Global MAF <sup>s</sup> | Highest Population MAF <sup>s</sup> |
|-------------------------|-------------------------------|-------------------------|-------------------------------------|
| <b>MALAT1.rs3200401</b> | T = 0.34                      | T = 0.14                | T = 0.31                            |
| <b>PVT1.rs13255292</b>  | T = 0.42                      | T = 0.20                | T = 0.43                            |

MAF, minor allele frequency. <sup>s</sup>according to Ensembl release 102 - November 2020 ©.

**Table S2:** Hardey-Winberg equilibrium of rs3200401 and rs13255292in CRC group

| <b>MALAT.rs3200401.C.T. Exact Test for Hardy-Weinberg Equilibrium (n = 280)</b> |    |     |    |     |     |                |
|---------------------------------------------------------------------------------|----|-----|----|-----|-----|----------------|
|                                                                                 | CC | CT  | TT | C   | T   | <i>p</i> Value |
| <b>All subjects</b>                                                             | 73 | 110 | 57 | 256 | 224 | 0.24           |
| <b>CONTROL</b>                                                                  | 42 | 48  | 10 | 132 | 68  | 0.66           |
| <b>CRC</b>                                                                      | 31 | 62  | 47 | 124 | 156 | 0.23           |
| <b>PVT.rs13255292.C.T. Exact Test for Hardy-Weinberg Equilibrium (n = 280)</b>  |    |     |    |     |     |                |
|                                                                                 | CC | CT  | TT | C   | T   | <i>p</i> Value |
| <b>All subjects</b>                                                             | 95 | 117 | 28 | 307 | 173 | 0.4            |
| <b>CONTROL</b>                                                                  | 31 | 55  | 14 | 117 | 83  | 0.22           |
| <b>CRC</b>                                                                      | 64 | 62  | 14 | 190 | 90  | 1              |

Hardey-Winberg equilibrium was done by chi-square test.  $p < 0.05$  means statistical significance. AIC: Akaike's Information Criteria, BIC: Bayesian Information Criteria.

**Table S3:** MALAT1 rs3200401 CT association with control and AP groups

| <b>MALAT1 rs3200401 CT Association with Control and AP Groups (n = 140, Adjusted by AGE+GENDER)</b> |          |          |            |                  |         |       |       |
|-----------------------------------------------------------------------------------------------------|----------|----------|------------|------------------|---------|-------|-------|
| Model                                                                                               | Genotype | CONTROL  | AP         | OR (95% CI)      | P-value | AIC   | BIC   |
| Codominant                                                                                          | C/C      | 42 (42%) | 17 (42.5%) | 1.00             | 0.26    | 167   | 181.7 |
|                                                                                                     | C/T      | 48 (48%) | 15 (37.5%) | 0.94 (0.41–2.20) |         |       |       |
|                                                                                                     | T/T      | 10 (10%) | 8 (20%)    | 2.37 (0.76–7.37) |         |       |       |
| Dominant                                                                                            | C/C      | 42 (42%) | 17 (42.5%) | 1.00             | 0.65    | 167.5 | 179.2 |
|                                                                                                     | C/T-T/T  | 58 (58%) | 23 (57.5%) | 1.20 (0.55-2.60) |         |       |       |
| Recessive                                                                                           | C/C-C/T  | 90 (90%) | 32 (80%)   | 1.00             | 0.1     | 165   | 176.7 |
|                                                                                                     | T/T      | 10 (10%) | 8 (20%)    | 2.44 (0.85–6.98) |         |       |       |
| Overdominant                                                                                        | C/C-T/T  | 52 (52%) | 25 (62.5%) | 1.00             | 0.48    | 167.2 | 178.9 |
|                                                                                                     | C/T      | 48 (48%) | 15 (37.5%) | 0.76 (0.35–1.64) |         |       |       |
| Log-additive                                                                                        | ---      | ---      | ---        | 1.38 (0.80–2.41) | 0.25    | 166.3 | 178.1 |

SNPs association was done using SNPstat software analysis.  $p < 0.05$  means statistical significance. AIC: Akaike's Information Criteria, BIC: Bayesian Information Criteria.

**Table S4:** *PVT1 rs13255292* CT association with control and AP groups

| <i>PVT1 rs13255292</i> CT Association with Control and AP Groups( <i>n</i> = 140, Adjusted by AGE+GENDER) |          |          |          |                  |         |       |       |
|-----------------------------------------------------------------------------------------------------------|----------|----------|----------|------------------|---------|-------|-------|
| Model                                                                                                     | Genotype | CONTROL  | AP       | OR (95% CI)      | P-value | AIC   | BIC   |
| Codominant                                                                                                | CC       | 31 (31%) | 16 (40%) | 1.00             | 0.7     | 169   | 183.7 |
|                                                                                                           | CT       | 55 (55%) | 20 (50%) | 0.79 (0.35–1.79) |         |       |       |
|                                                                                                           | TT       | 14 (14%) | 4 (10%)  | 0.60 (0.16–2.20) |         |       |       |
| Dominant                                                                                                  | CC       | 31 (31%) | 16 (40%) | 1.00             | 0.47    | 167.1 | 178.9 |
|                                                                                                           | CT-TT    | 69 (69%) | 24 (60%) | 0.75 (0.34–1.65) |         |       |       |
| Recessive                                                                                                 | CC-CT    | 86 (86%) | 36 (90%) | 1.00             | 0.53    | 167.3 | 179   |
|                                                                                                           | TT       | 14 (14%) | 4 (10%)  | 0.69 (0.20–2.31) |         |       |       |
| Overdominant                                                                                              | CC-TT    | 45 (45%) | 20 (50%) | 1.00             | 0.78    | 167.6 | 179.4 |
|                                                                                                           | CT       | 55 (55%) | 20 (50%) | 0.90 (0.42–1.92) |         |       |       |
| Log-additive                                                                                              | ---      | ---      | ---      | 0.78 (0.43–1.40) | 0.4     | 167   | 178.7 |

SNPs association was done using SNPstat software analysis.  $p < 0.05$  means statistical significance. AIC: Akaike's Information Criteria, BIC: Bayesian Information Criteria.

**Table S5:** Correlation between the studied SNPs and clinicopathological factors

| <i>MALAT1 rs3200401</i> CT Association with Response Anatominal Site ( <i>n</i> = 140, Adjusted by AGE+Age) |          |            |            |                  |                |       |       | <i>PVT1 rs13255292</i> CT Association with Response Anatominal Site ( <i>n</i> = 140, Adjusted by AGE+Age) |          |            |            |                  |                |       |       |
|-------------------------------------------------------------------------------------------------------------|----------|------------|------------|------------------|----------------|-------|-------|------------------------------------------------------------------------------------------------------------|----------|------------|------------|------------------|----------------|-------|-------|
| Model                                                                                                       | Genotype | Rectum     | Colon      | OR (95% CI)      | <i>p</i> Value | AIC   | BIC   | Model                                                                                                      | Genotype | Rectum     | Colon      | OR (95% CI)      | <i>p</i> Value | AIC   | BIC   |
| Codominant                                                                                                  | T/T      | 11 (29.7%) | 36 (35%)   | 1                | 0.54           | 168.1 | 179.8 | Codominant                                                                                                 | C/C      | 14 (37.8%) | 50 (48.5%) | 1                | 0.27           | 166.6 | 178.4 |
|                                                                                                             | C/T      | 19 (51.4%) | 43 (41.8%) | 0.69 (0.29–1.63) |                |       |       |                                                                                                            | C/T      | 17 (46%)   | 45 (43.7%) | 0.72 (0.32–1.64) |                |       |       |
|                                                                                                             | C/C      | 7 (18.9%)  | 24 (23.3%) | 1.12 (0.38–3.36) |                |       |       |                                                                                                            | T/T      | 6 (16.2%)  | 8 (7.8%)   | 0.36 (0.11–1.23) |                |       |       |
| Dominant                                                                                                    | T/T      | 11 (29.7%) | 36 (35%)   | 1                | 0.59           | 167   | 175.8 | Dominant                                                                                                   | C/C      | 14 (37.8%) | 50 (48.5%) | 1                | 0.24           | 165.9 | 174.7 |
|                                                                                                             | C/T-C/C  | 26 (70.3%) | 67 (65%)   | 0.80 (0.35–1.81) |                |       |       |                                                                                                            | C/T-T/T  | 23 (62.2%) | 53 (51.5%) | 0.63 (0.29–1.36) |                |       |       |
| Recessive                                                                                                   | T/T-C/T  | 30 (81.1%) | 79 (76.7%) | 1                | 0.48           | 166.8 | 175.6 | Recessive                                                                                                  | C/C-C/T  | 31 (83.8%) | 95 (92.2%) | 1                | 0.15           | 165.3 | 174.1 |
|                                                                                                             | C/C      | 7 (18.9%)  | 24 (23.3%) | 1.40 (0.54–3.66) |                |       |       |                                                                                                            | T/T      | 6 (16.2%)  | 8 (7.8%)   | 0.43 (0.14–1.34) |                |       |       |
| Overdominant                                                                                                | T/T-C/C  | 18 (48.6%) | 60 (58.2%) | 1                | 0.28           | 166.1 | 174.9 | Overdominant                                                                                               | C/C-T/T  | 20 (54%)   | 58 (56.3%) | 1                | 0.78           | 167.2 | 176   |
|                                                                                                             | C/T      | 19 (51.4%) | 43 (41.8%) | 0.66 (0.31–1.40) |                |       |       |                                                                                                            | C/T      | 17 (46%)   | 45 (43.7%) | 0.90 (0.42–1.91) |                |       |       |

| Log-Additive                                                                                          | ---      | ---        | ---          | 1.01 (0.60–1.69)        | 0.97           | 167.3 | 176.1 | Log-Additive                                                                                         | ---      | ---        | ---          | 0.63 (0.36–1.12) | 0.12           | 164.8 | 173.7 |
|-------------------------------------------------------------------------------------------------------|----------|------------|--------------|-------------------------|----------------|-------|-------|------------------------------------------------------------------------------------------------------|----------|------------|--------------|------------------|----------------|-------|-------|
| MALAT1 rs3200401 CT Association with Stage ( <i>n</i> = 140, Adjusted by AGE+Age)                     |          |            |              |                         |                |       |       | PVT1 rs13255292 CT Association with Stage ( <i>n</i> = 140, Adjusted by AGE+Age)                     |          |            |              |                  |                |       |       |
| Model                                                                                                 | Genotype | Stage I+II | Stage=III+IV | OR (95% CI)             | <i>p</i> value | AIC   | BIC   | Model                                                                                                | Genotype | Stage I+II | Stage=III+IV | OR (95% CI)      | <i>p</i> Value | AIC   | BIC   |
| Codominant                                                                                            | T/T      | 32 (36.4%) | 15 (28.9%)   | 1                       | 0.33           | 189.9 | 201.7 | Codominant                                                                                           | C/C      | 38 (43.2%) | 26 (50%)     | 1                | 0.76           | 191.6 | 203.4 |
|                                                                                                       | C/T      | 35 (39.8%) | 27 (51.9%)   | 1.66 (0.75–3.68)        |                |       |       |                                                                                                      | C/T      | 41 (46.6%) | 21 (40.4%)   | 0.76 (0.37–1.58) |                |       |       |
|                                                                                                       | C/C      | 21 (23.9%) | 10 (19.2%)   | 0.94 (0.35–2.53)        |                |       |       |                                                                                                      | T/T      | 9 (10.2%)  | 5 (9.6%)     | 0.83 (0.25–2.76) |                |       |       |
| Dominant                                                                                              | T/T      | 32 (36.4%) | 15 (28.9%)   | 1                       | 0.38           | 189.4 | 198.2 | Dominant                                                                                             | C/C      | 38 (43.2%) | 26 (50%)     | 1                | 0.47           | 189.6 | 198.5 |
|                                                                                                       | C/T-C/C  | 56 (63.6%) | 37 (71.2%)   | 1.39 (0.66–2.92)        |                |       |       |                                                                                                      | C/T-T/T  | 50 (56.8%) | 26 (50%)     | 0.77 (0.39–1.54) |                |       |       |
| Recessive                                                                                             | T/T-C/T  | 67 (76.1%) | 42 (80.8%)   | 1                       | 0.42           | 189.5 | 198.3 | Recessive                                                                                            | C/C-C/T  | 79 (89.8%) | 47 (90.4%)   | 1                | 0.92           | 190.1 | 199   |
|                                                                                                       | C/C      | 21 (23.9%) | 10 (19.2%)   | 0.70 (0.30–1.67)        |                |       |       |                                                                                                      | T/T      | 9 (10.2%)  | 5 (9.6%)     | 0.94 (0.30–2.99) |                |       |       |
| Overdominant                                                                                          | T/T-C/C  | 53 (60.2%) | 25 (48.1%)   | 1                       | 0.14           | 187.9 | 196.8 | Overdominant                                                                                         | C/C-T/T  | 47 (53.4%) | 31 (59.6%)   | 1                | 0.5            | 189.7 | 198.5 |
|                                                                                                       | C/T      | 35 (39.8%) | 27 (51.9%)   | 1.70 (0.84–3.42)        |                |       |       |                                                                                                      | C/T      | 41 (46.6%) | 21 (40.4%)   | 0.79 (0.39–1.58) |                |       |       |
| Log-Additive                                                                                          | ---      | ---        | ---          | 1.03 (0.64–1.64)        | 0.91           | 190.1 | 199   | Log-Additive                                                                                         | ---      | ---        | ---          | 0.85 (0.50–1.45) | 0.55           | 189.8 | 198.6 |
| MALAT1 rs3200401 CT Association with Response Lymphnode Status ( <i>n</i> = 140, Adjusted by AGE+Age) |          |            |              |                         |                |       |       | PVT1 rs13255292 CT Association with Response Lymphnode Status ( <i>n</i> = 140, Adjusted by AGE+Age) |          |            |              |                  |                |       |       |
| Model                                                                                                 | Genotype | Absent     | Present      | OR (95% CI)             | <i>p</i> Value | AIC   | BIC   | Model                                                                                                | Genotype | Absent     | Present      | OR (95% CI)      | <i>p</i> Value | AIC   | BIC   |
| Codominant                                                                                            | T/T      | 25 (28.4%) | 22 (42.3%)   | 1                       | 0.065          | 186.9 | 198.7 | Codominant                                                                                           | C/C      | 38 (43.2%) | 26 (50%)     | 1                | 0.75           | 191.8 | 203.6 |
|                                                                                                       | C/T      | 39 (44.3%) | 23 (44.2%)   | 0.67 (0.31–1.46)        |                |       |       |                                                                                                      | C/T      | 41 (46.6%) | 21 (40.4%)   | 0.76 (0.37–1.57) |                |       |       |
|                                                                                                       | C/C      | 24 (27.3%) | 7 (13.5%)    | <b>0.30 (0.11–0.86)</b> |                |       |       |                                                                                                      | T/T      | 9 (10.2%)  | 5 (9.6%)     | 0.82 (0.25–2.74) |                |       |       |
| Dominant                                                                                              | T/T      | 25 (28.4%) | 22 (42.3%)   | 1                       | 0.086          | 187.5 | 196.3 | Dominant                                                                                             | C/C      | 38 (43.2%) | 26 (50%)     | 1                | 0.46           | 189.9 | 198.7 |
|                                                                                                       | C/T-C/C  | 63 (71.6%) | 30 (57.7%)   | 0.53 (0.26–1.09)        |                |       |       |                                                                                                      | C/T-T/T  | 50 (56.8%) | 26 (50%)     | 0.77 (0.39–1.54) |                |       |       |
| Recessive                                                                                             | T/T-C/T  | 64 (72.7%) | 45 (86.5%)   | 1                       | 0.035          | 185.9 | 194.8 | Recessive                                                                                            | C/C-C/T  | 79 (89.8%) | 47 (90.4%)   | 1                | 0.92           | 190.4 | 199.2 |

|                                                                                         | C/C      | 24 (27.3%) | 7 (13.5%)  | 0.38 (0.15–0.98) |         |       |       |                                                                                       | T/T      | 9 (10.2%)   | 5 (9.6%)   | 0.94 (0.30–2.98) |         |       |       |
|-----------------------------------------------------------------------------------------|----------|------------|------------|------------------|---------|-------|-------|---------------------------------------------------------------------------------------|----------|-------------|------------|------------------|---------|-------|-------|
| Overdominant                                                                            | T/T-C/C  | 49 (55.7%) | 29 (55.8%) | 1                | 0.96    | 190.4 | 199.2 | Overdominant                                                                          | C/C-T/T  | 47 (53.4%)  | 31 (59.6%) | 1                | 0.5     | 189.9 | 198.8 |
|                                                                                         | C/T      | 39 (44.3%) | 23 (44.2%) | 1.02 (0.51–2.04) |         |       |       |                                                                                       | C/T      | 41 (46.6%)  | 21 (40.4%) | 0.79 (0.39–1.58) |         |       |       |
| Log-Additive                                                                            | ---      | ---        | ---        | 0.57 (0.35–0.93) | 0.023   | 185.2 | 194   | Log-Additive                                                                          | ---      | ---         | ---        | 0.85 (0.50–1.44) | 0.54    | 190   | 198.8 |
| MALAT1 rs3200401 CT Association with Response Metastasis (n = 140, adjusted by AGE+Age) |          |            |            |                  |         |       |       | PVT rs13255292 CT Association with Response Metastasis (n = 140, Adjusted by AGE+Age) |          |             |            |                  |         |       |       |
| Model                                                                                   | Genotype | Absent     | Present    | OR (95% CI)      | p Value | AIC   | BIC   | Model                                                                                 | Genotype | Absent      | Present    | OR (95% CI)      | p Value | AIC   | BIC   |
| Codominant                                                                              | T/T      | 36 (31%)   | 11 (45.8%) | 1                | 0.35    | 133.8 | 145.5 | Codominant                                                                            | C/C      | 52 (44.8%)  | 12 (50%)   | 1                | 0.91    | 135.7 | 147.4 |
|                                                                                         | C/T      | 53 (45.7%) | 9 (37.5%)  | 0.56 (0.21–1.49) |         |       |       |                                                                                       | C/T      | 52 (44.8%)  | 10 (41.7%) | 0.85 (0.34–2.15) |         |       |       |
|                                                                                         | C/C      | 27 (23.3%) | 4 (16.7%)  | 0.45 (0.13–1.59) |         |       |       |                                                                                       | T/T      | 12 (10.3%)  | 2 (8.3%)   | 0.74 (0.15–3.76) |         |       |       |
| Dominant                                                                                | T/T      | 36 (31%)   | 11 (45.8%) | 1                | 0.16    | 131.9 | 140.7 | Dominant                                                                              | C/C      | 52 (44.8%)  | 12 (50%)   | 1                | 0.68    | 133.7 | 142.5 |
|                                                                                         | C/T-C/C  | 80 (69%)   | 13 (54.2%) | 0.52 (0.21–1.28) |         |       |       |                                                                                       | C/T-T/T  | 64 (55.2%)  | 12 (50%)   | 0.83 (0.34–2.01) |         |       |       |
| Recessive                                                                               | T/T-C/T  | 89 (76.7%) | 20 (83.3%) | 1                | 0.39    | 133.1 | 142   | Recessive                                                                             | C/C-C/T  | 104 (89.7%) | 22 (91.7%) | 1                | 0.77    | 133.8 | 142.6 |
|                                                                                         | C/C      | 27 (23.3%) | 4 (16.7%)  | 0.60 (0.19–1.96) |         |       |       |                                                                                       | T/T      | 12 (10.3%)  | 2 (8.3%)   | 0.80 (0.17–3.82) |         |       |       |
| Overdominant                                                                            | T/T-C/C  | 63 (54.3%) | 15 (62.5%) | 1                | 0.5     | 133.4 | 142.3 | Overdominant                                                                          | C/C-T/T  | 64 (55.2%)  | 14 (58.3%) | 1                | 0.81    | 133.8 | 142.6 |
|                                                                                         | C/T      | 53 (45.7%) | 9 (37.5%)  | 0.73 (0.30–1.82) |         |       |       |                                                                                       | C/T      | 52 (44.8%)  | 10 (41.7%) | 0.90 (0.37–2.19) |         |       |       |
| Log-Additive                                                                            | ---      | ---        | ---        | 0.64 (0.35–1.20) | 0.16    | 131.9 | 140.7 | Log-additive                                                                          | ---      | ---         | ---        | 0.86 (0.43–1.70) | 0.66    | 133.7 | 14    |

Correlation was done using SNPstat software analysis.  $p < 0.05$  means statistical significance. AIC: Akaike's Information Criteria, BIC: Bayesian Information Criteria.

**Table S6:** Correlation between the studied parameters and clinicopathological factors

| Spearman Correlation | MALAT1  | miRNA-101 | PVT1    | miRNA-186 | E-Cadherin | Age     | Gender  | Anatominal Site | Stage   | Lymphnode Status | Metastasis |
|----------------------|---------|-----------|---------|-----------|------------|---------|---------|-----------------|---------|------------------|------------|
| MALAT1               | 1.0000  | −0.4025   | 0.3608  | −0.3208   | −0.3236    | 0.0953  | 0.1020  | 0.1925          | 0.3340  | 0.3600           | 0.3062     |
| miRNA-101            | −0.4025 | 1.0000    | 0.0132  | 0.0238    | 0.3559     | −0.0532 | 0.0071  | 0.0185          | −0.4132 | −0.3390          | −0.3377    |
| PVT1                 | 0.3608  | 0.0132    | 1.0000  | −0.4688   | −0.3078    | 0.1436  | 0.1685  | −0.1660         | 0.4412  | 0.3181           | 0.3018     |
| miRNA-186            | −0.3208 | 0.0238    | −0.4688 | 1.0000    | 0.5002     | −0.0440 | −0.1413 | −0.0266         | −0.2976 | −0.1790          | −0.4011    |

|                                          |               |                  |             |                  |                   |            |               |                        |              |                         |                   |
|------------------------------------------|---------------|------------------|-------------|------------------|-------------------|------------|---------------|------------------------|--------------|-------------------------|-------------------|
| E-cadherin                               | -0.1947       | 0.2302           | -0.1831     | 0.1299           | 1.0000            | 0.0247     | 0.2519        | -0.1096                | -0.1618      | -0.2078                 | -0.3953           |
| Age                                      | 0.0953        | -0.0532          | 0.1436      | -0.0440          | -0.1060           | 1.0000     | -0.2072       | -0.0601                | 0.0760       | 0.0545                  | 0.0760            |
| Gender                                   | 0.1020        | 0.0071           | 0.1685      | -0.1413          | 0.0751            | -0.2072    | 1.0000        | -0.1280                | 0.0132       | 0.0132                  | 0.0170            |
| Anatominal site                          | 0.1925        | 0.0185           | -0.1660     | -0.0266          | 0.0388            | -0.0601    | -0.1280       | 1.0000                 | -0.2098      | -0.1427                 | 0.0577            |
| Stage                                    | 0.3348        | -0.4132          | 0.4412      | -0.3976          | -0.2878           | 0.0760     | 0.0132        | -0.2098                | 1.0000       | 0.6635                  | 0.3172            |
| Lymphnode status                         | 0.3348        | -0.3390          | 0.3181      | -0.2790          | -0.2288           | 0.0545     | 0.0132        | -0.1427                | 0.6635       | 1.0000                  | 0.4740            |
| Metastasis                               | 0.3062        | -0.3377          | 0.3018      | -0.4611          | -0.4483           | 0.0760     | 0.0170        | 0.0577                 | 0.3172       | 0.4740                  | 1.0000            |
| <b>Correlations <math>p</math> Value</b> | <b>MALAT1</b> | <b>miRNA-101</b> | <b>PVT1</b> | <b>miRNA-186</b> | <b>E-Cadherin</b> | <b>Age</b> | <b>Gender</b> | <b>Anatominal Site</b> | <b>Stage</b> | <b>Lymphnode Status</b> | <b>Metastasis</b> |
| MALAT1                                   |               | 0.0061           | 0.0149      | 0.0435           | 0.0343            | 0.5285     | 0.5002        | 0.2000                 | 0.0231       | 0.0191                  | 0.0385            |
| miRNA-101                                | 0.0061        |                  | 0.9323      | 0.8856           | 0.0207            | 0.7287     | 0.9633        | 0.9040                 | 0.0048       | 0.0227                  | 0.0233            |
| PVT1                                     | 0.0149        | 0.9323           |             | 0.0019           | 0.0447            | 0.3411     | 0.2629        | 0.2703                 | 0.0021       | 0.0312                  | 0.0415            |
| miRNA-186                                | 0.0435        | 0.8856           | 0.00199     |                  | 0.0012            | 0.7849     | 0.3780        | 0.8689                 | 0.0588       | 0.2627                  | 0.0094            |
| E-cadherin                               | 0.2108        | 0.1424           | 0.23418     | 0.42422          |                   | 0.8737     | 0.0991        | 0.4789                 | 0.2939       | 0.1759                  | 0.0079            |
| Age                                      | 0.5285        | 0.7287           | 0.34114     | 0.78489          | 0.4882            |            | 0.0140        | 0.4805                 | 0.3724       | 0.5226                  | 0.3723            |
| Gender                                   | 0.5002        | 0.9633           | 0.26291     | 0.37805          | 0.6238            | 0.0140     |               | 0.1318                 | 0.8768       | 0.8768                  | 0.8424            |
| Anatominal site                          | 0.2000        | 0.9040           | 0.27029     | 0.86892          | 0.8000            | 0.4805     | 0.1318        |                        | 0.0129       | 0.0925                  | 0.4982            |
| Stage                                    | 0.0230        | 0.0048           | 0.00215     | 0.05882          | 0.0552            | 0.3724     | 0.8768        | 0.0129                 |              | < 0.0001                | < 0.0001          |
| Lymphnode status                         | 0.0230        | 0.0227           | 0.03119     | 0.26269          | 0.1305            | 0.5226     | 0.8768        | 0.0925                 | < 0.0001     |                         | < 0.0001          |
| Metastasis                               | 0.0385        | 0.0233           | 0.04150     | 0.00935          | 0.0020            | 0.3723     | 0.8424        | 0.4982                 | < 0.0001     | < 0.0001                |                   |

Correlation was done by spearman correlation.  $p < 0.05$  means statistical significance.
